# Supplementary material for: Enhancement of CO gas sensing performance by Mn-doped porous ZnSnO3 microspheres
Source: Royal Society of Chemistry journal article supplement (doi:10.1039/d2ra06785d), 2022-01-01
Supplement: d2ra06785d1.pdf [file d2ra06785d1.pdf]

# Enhancement of CO gas sensing performance by Mn-doped porous ZnSnO<sub>3</sub> microspheres

Manish Kumar Tiwari<sup>1</sup>, Subhash Chand Yadav<sup>1</sup>, Abhishek Srivastava<sup>1</sup>, Archana Kanwade<sup>1</sup>, Jena Akash Kumar Satrughna<sup>2</sup>, Sawanta S. Mali<sup>3</sup>, Jyoti V. Patil<sup>3</sup>, Chang Kook Hong<sup>3</sup>, and Parasharam M. Shirage<sup>1\*</sup>

<sup>1</sup>Department of Metallurgy Engineering and Materials Science, Indian Institute of Technology Indore, Simrol, Khandwa Road, Indore, India – 453552.

<sup>2</sup>Department of Physics, Indian Institute of Technology Indore, Simrol, Khandwa Road, Indore, India – 453552.

<sup>3</sup>Polymer Energy Materials Laboratory, School of Chemical Engineering, Chonnam National University, Gwangju South Korea - 61186.

\*Email: pmshirage@iiti.ac.in, paras.shirage@gmail.com

## Supporting Information

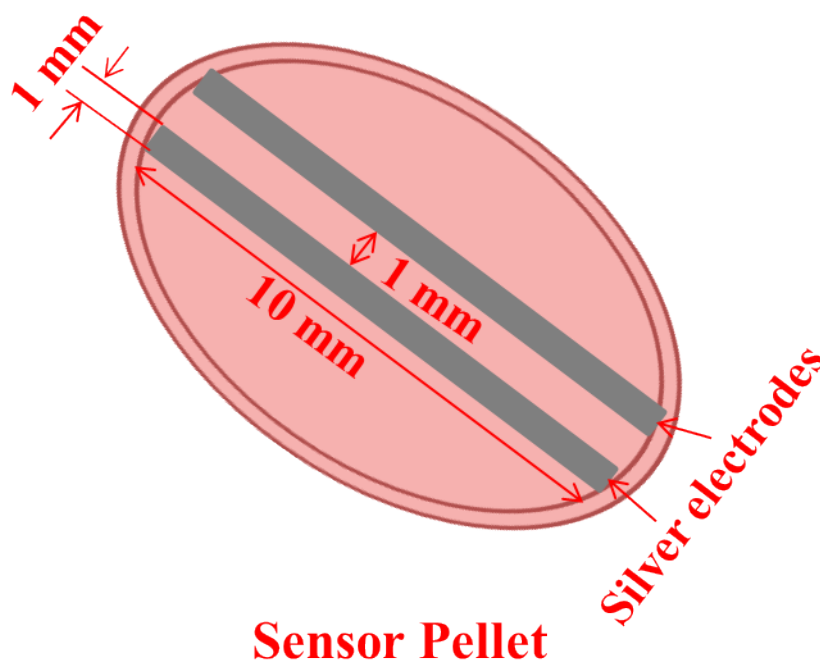

**Fig. S1** Schematic illustration of the gas sensor fabricated using pellet consisting of Mn-doped ZnSnO<sub>3</sub>.

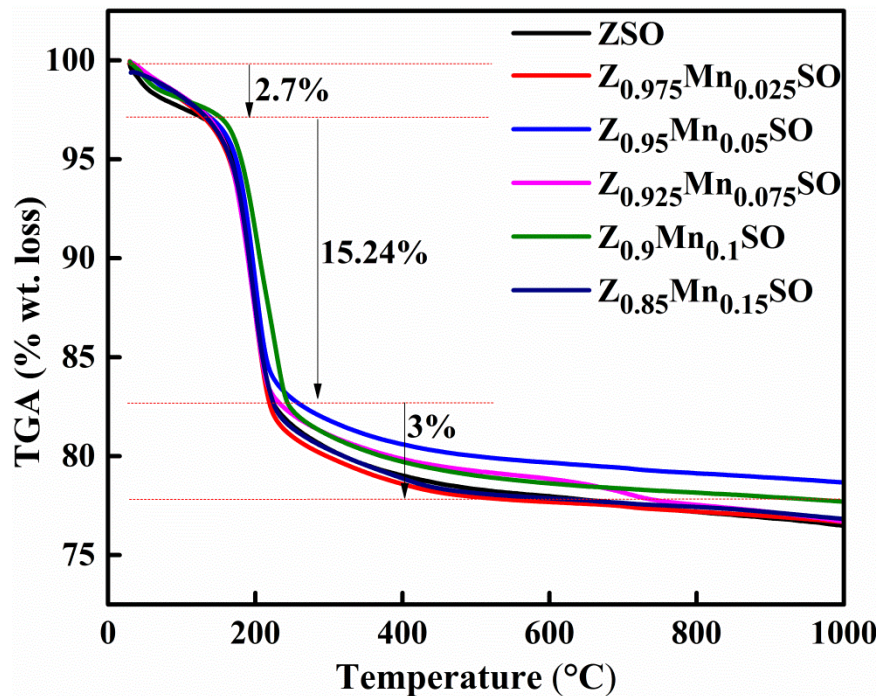

**Fig. S2** TGA plot of the as-prepared samples of the Zn<sub>1-x</sub>Mn<sub>x</sub>SnO<sub>3</sub>,  $x = 0, 0.025, 0.05, 0.075, 0.1, 0.15$ .

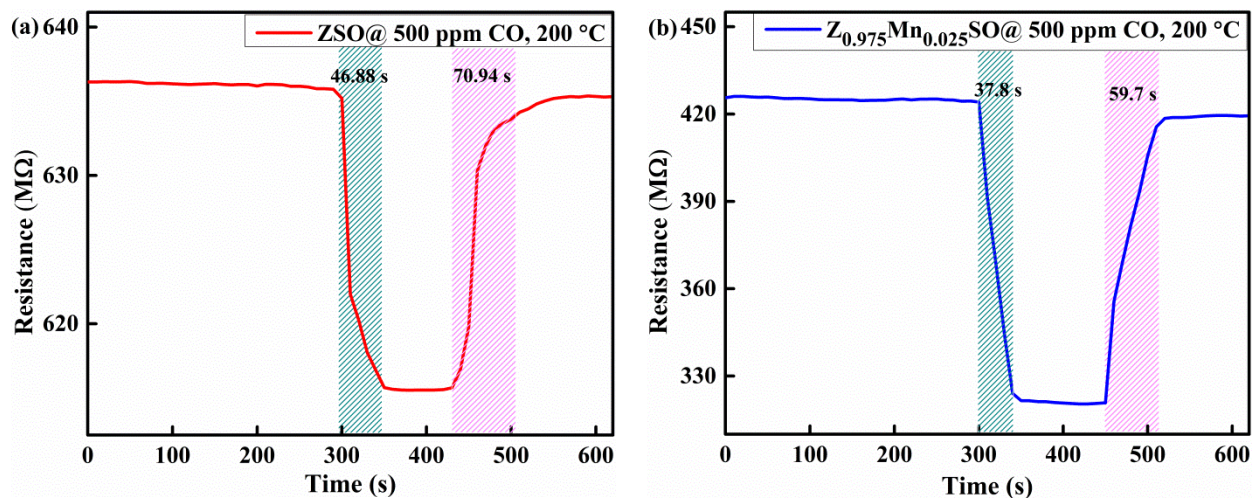

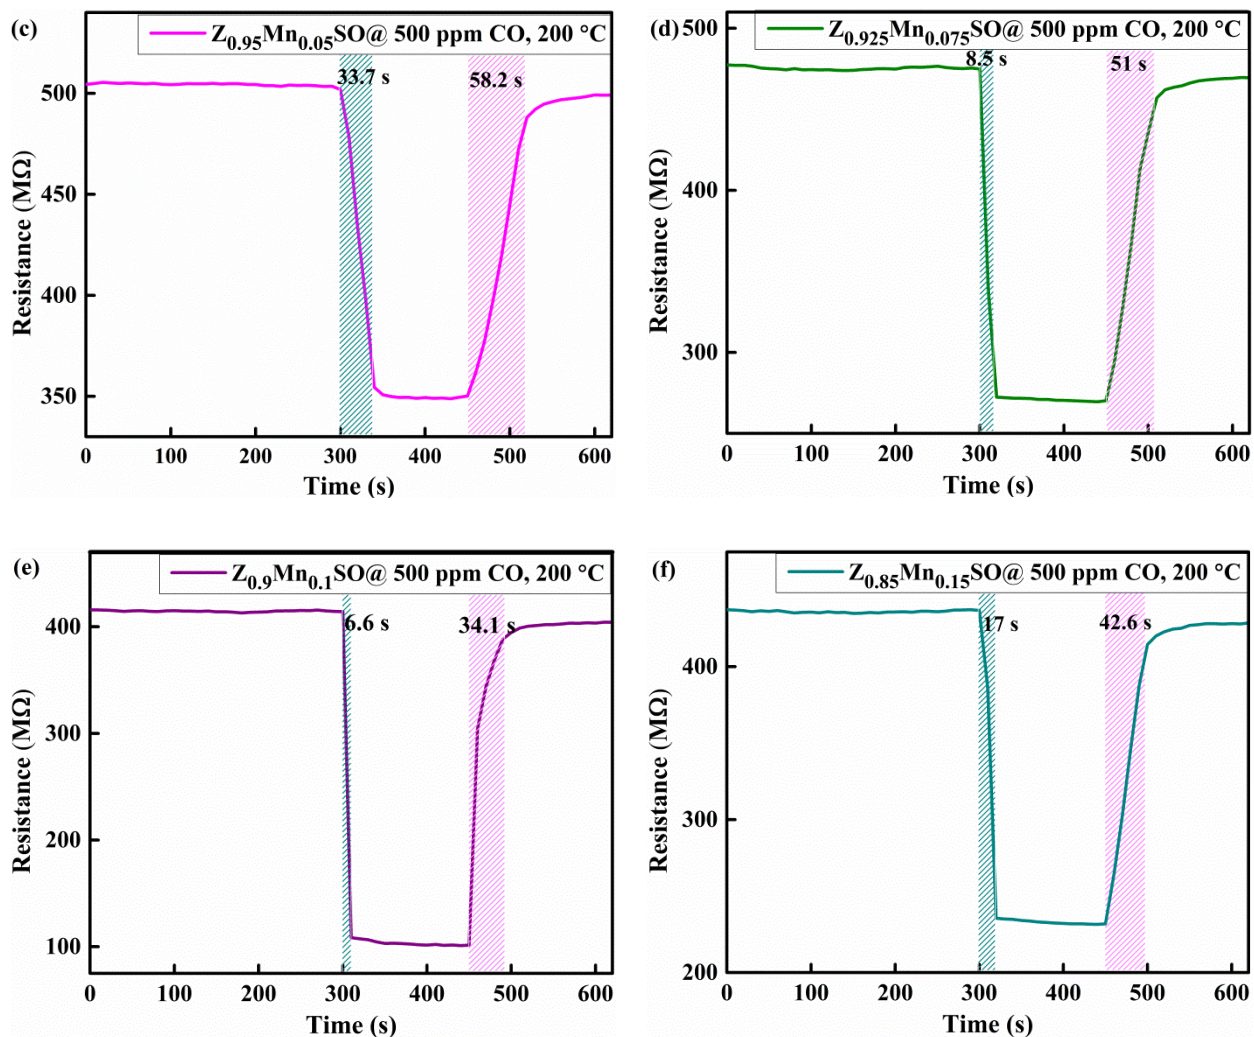

**Fig. S3** Response and recovery time curves of the  $Zn_{1-x}Mn_xSnO_3$  upon exposure to 500 ppm CO at the operating temperature of 200 °C,  $x = (a) 0, (b) 0.025, (c) 0.05, (d) 0.075, (e) 0.1, \text{ and } (f) 0.15$ .
